# Supplementary material for: New Eye Lens Dose Limit: Status of Knowledge in Campania Hospitals
Source: MDPI journal article supplement (doi:10.3390/ijerph16183450), 2019-09-17
Supplement: s1 [file s1]

## INTERVIEW TO MEDICAL STUFF on the use of RADIOPROTECTION MEASURES

HOSPITAL:

DEPARTMENT:

- 1) What Professional category do you belong to? *Physician/MRT/Nurse*
- 2) What is your Classification? *Category A/category B*
- 3) Do you know the new limit of the equivalent dose to the eye lens proposed by the Directive EURATOM 59/2013? *Yes/No*
- 4) (in the case of affirmative answer to the previous question) what is the value of the new limit? ---
- 5) From which source did you learn this information? *courses of study/working training/workshop/etc.*
- 6) Do you use the individual protection devices (IPD)? *Yes/No*
- 7) (in the case of affirmative answer to the previous question) what personal protective equipment do you use? *lead apron/ thyroid collar/ lead glass/mask/lead cap*
- 8) Do you perform the eye lens dosimetry? *Yes/No*
- 9) (in the case of affirmative answer to the previous question) which device do you use to fix the dosimeter? *headband/cap/glass/etc.*
- 10) Which is the setting position of the dosimeter respect to the device? *frontal/lateral*
